# Supplementary material for: Dermoscopy for melanoma detection and triage in primary care: a systematic review
Source: PubMed Central journal article supplement (PMC6707687; doi:10.1136/bmjopen-2018-027529), 2019-08-20
Supplement: bmjopen-2018-027529supp001.pdf [file bmjopen-2018-027529supp001.pdf]

## Supporting Information

### Appendix 1 – Protocol for methods

#### Databases

We searched the following bibliographic databases from January 1990 to December 2017 for relevant published studies:

- Medline
- The Cochrane Central Register of Controlled Trials (CENTRAL) in the Cochrane Library
- EMBASE
- CINAHL (Cumulative Index to Nursing and Allied Health Literature via EBSCO)
- SCOPUS

#### Inclusion and exclusion criteria

The following inclusion criteria were applied:

- i. All published literature from January 1990 to December 2017
- ii. Which provide evidence around test accuracy, utility, acceptability to patients and GPs, and cost-effectiveness of dermoscopy modes in primary care
- iii. Including trials, diagnostic accuracy and acceptability studies

The following exclusion criteria were also applied:

- i. Studies based in any clinical setting other than at the first assessment of suspicious skin lesions (i.e. primary care in the UK)
- ii. Studies involving specialist clinicians (in line with the Cochrane review of dermoscopy which stated 'although primary care clinicians can in practice be specialists in skin cancer, we considered primary care physicians as generalist practitioners and dermatologists as specialists'<sup>1</sup>.)
- iii. Studies that are not primary studies

#### Search Strategy

An electronic literature search of Medline, EMBASE, CENTRAL, CINAHL, and SCOPUS was performed from January 1990 to December 2017 using a combination of subject headings as detailed in Appendix Two. The validity of the search strategy was assessed by cross-checking articles identified in the search against:

- i. the reference lists of key review articles<sup>1-5</sup>
- ii. papers identified by a first and last author search of six key papers in the field<sup>6-11</sup>

The search was then further extended by manually screening the reference lists of all included papers.

#### Study Selection

The study selection followed these stages:

1. The titles and abstracts of the complete list of identified papers were independently assessed by one researcher (OTJ) against the inclusion and exclusion criteria. Those studies clearly not relevant were rejected at this stage.
2. One or two other members of the research team (SH, LJ) independently assessed a random selection of 10% of the papers that have been excluded, to check agreement between the reviewers.
3. For studies where a definite decision to reject could not be made based on title and abstract alone, the full paper was obtained for detailed assessment.
4. At least two reviewers (OTJ, FW, SH, LJ, MvM) independently assessed the full-text of included articles for the possibility of inclusion in the review. Papers identified as not meeting the inclusion criteria by both researchers were excluded.

5. The researchers met regularly to discuss papers in which it is unclear whether they meet the inclusion criteria or not and any disagreements were resolved by discussion with other members of the research team.

### **Data Extraction**

Included papers had relevant information extracted and entered into a spreadsheet, including:

1. The characteristics of the study including:
  - a. Study details
  - b. Location of study
  - c. Study design
  - d. Study population
    - i. Primary care, referred, secondary care
    - ii. Control comparator
    - iii. Total number of benign/suspicious lesions and number of patients
    - iv. Gender
    - v. Age
  - e. Study methods
    - i. Selection of participants
    - ii. Exclusions
    - iii. Follow-up time
    - iv. Definition of the outcome
2. The outcomes of the study in terms of:
  - a. Number of lesions deemed banal and suspicious in control and intervention groups
  - b. Number of excised lesions and excised benign lesions
  - c. Outcome Measure: Sensitivity/specificity
  - d. Outcome Measure: Positive Predictive Value/Negative Predictive Value
  - e. Outcome Measure: Others (e.g. diagnostic rate of new test, accuracy index etc.)
  - f. Outcome Measure: specific to melanoma
  - g. Stage of melanoma at diagnosis
  - h. 5-year survival rate
3. Challenges for implementation in primary care:
  - a. Training
  - b. Cost
  - c. Availability
  - d. Cost-effective analysis.

To minimise bias, data extraction was undertaken by the lead researcher (OTJ) and by at least one other researcher independently (FMW or LJ). The research team met regularly to ensure consensus of views by discussing and resolving any differences in data extraction.

### **Quality Assessment Framework**

Quality of the studies was assessed using the Joanna Briggs Institute Critical Appraisal Tools (Joanna Briggs Institute, 2016). The aim of the quality assessment was to determine the validity of the results based on the design, methods, analysis and conclusions of each study, and to assess the relative contribution of each study to the review. Limitations were acknowledged but studies were not excluded based on the quality assessment alone.

## References

1. Dinnes J, Matin RN, Moreau JF, Patel L, Chan SA, Chuchu N, et al. Tests to assist in the diagnosis of cutaneous melanoma in adults: a generic protocol. *Cochrane Database of Systematic Reviews*. 2015.
2. Chappuis P, Duru G, Marchal O, Girier P, Dalle S, Thomas L. Dermoscopy, a useful tool for general practitioners in melanoma screening: A nationwide survey. *British Journal of Dermatology*. 2016;175:744-50.
3. Chia A, Trevena L. A Systematic Review of Training to Improve Melanoma Diagnostic Skills in General Practitioners. *Journal of Cancer Education*. 2016;31(4):730-5.
4. Koelink CJ, Jonkman MF, Van Der Meer K, Van Der Heide WK. Examination of skin lesions for cancer: which clinical decision aids and tools are available in general practice? *European Journal of Dermatology*. 2014;24(3):297-304.
5. Herschorn A. Dermoscopy for melanoma detection in family practice. *Canadian Family Physician*. 2012;58(7):740-5.
6. Harrington E, Clyne B, Wesseling N, Sandhu H, Armstrong L, Bennett H, et al. Diagnosing malignant melanoma in ambulatory care: A systematic review of clinical prediction rules. *BMJ Open*. 2017;7 (3) (no pagination)(e014096).
7. Koelink C, Vermeulen K, Kollen B, Bock G, Dekker J, Jonkman M, et al. Diagnostic accuracy and cost-effectiveness of dermoscopy in primary care: a cluster randomized clinical trial. *Journal of the european academy of dermatology and venereology : JEADV [Internet]*. 2014; 28(11):[1442-9 pp.].
8. Walter FM, Morris HC, Humphrys E, Hall PN, Prevost AT, Burrows N, et al. Effect of adding a diagnostic aid to best practice to manage suspicious pigmented lesions in primary care: randomised controlled trial. *BMJ*. 2012;345:e4110.
9. Plüddemann A, Heneghan C, Thompson M, Wolstenholme J, Price CP. Dermoscopy for the diagnosis of melanoma: Primary care diagnostic technology update. *British Journal of General Practice*. 2011;61(587):416-7.
10. Argenziano G, Puig S, Zalaudek I, Sera F, Corona R, Alsina M, et al. Dermoscopy improves accuracy of primary care physicians to triage lesions suggestive of skin cancer. *Journal of Clinical Oncology*. 2006;24(12):1877-82.
11. Gerbert B, Bronstone A, Maurer T, Berger T, McPhee SJ, Caspers N. The effectiveness of an Internet-based tutorial in improving primary care physicians' skin cancer triage skills. *Journal of Cancer Education*. 2002;17(1):7-11.

## Appendix 2 – Search Strategies

The specific strategies for Medline, CENTRAL, EMBASE, CINAHL and SCOPUS were as follows:

### A. Medline

1. primary health care.mp. or exp Primary Health Care/
2. general practice.mp. or exp General Practice/
3. family practice.mp. or exp Family Practice/
4. ((family or general or community) adj2 (doctor\* or medicine or medical practitioner\* or medical practice\* or practice\* or practitioner\* or healthcare\* or health care\*)).mp. [mp=title, abstract, original title, name of substance word, subject heading word, keyword heading word, protocol supplementary concept word, rare disease supplementary concept word, unique identifier, synonyms]
5. ((primary or community) adj2 (care\* or health care\* or healthcare\* or medical care\* or patient care\*)).mp. [mp=title, abstract, original title, name of substance word, subject heading word, keyword heading word, protocol supplementary concept word, rare disease supplementary concept word, unique identifier, synonyms]
6. exp physicians, family/ or family physician\*.mp.
7. (nurse\* adj2 practi\*).mp. [mp=title, abstract, original title, name of substance word, subject heading word, keyword heading word, protocol supplementary concept word, rare disease supplementary concept word, unique identifier, synonyms]
8. clinician with minimal dermoscopy training.mp.
9. melanoma screening clinic\*.mp.
10. non-expert\*.mp.
11. generalist clinician\*.mp.
12. 1 or 2 or 3 or 4 or 5 or 6 or 7 or 8 or 9 or 10 or 11
13. dermoscopy.mp. or exp Dermoscopy/
14. dermatoscopy.mp.
15. epiluminescence microscopy.mp.
16. confocal microscopy.mp. or exp Microscopy, Confocal/
17. exp Photomicrography/ or photomicrograph.mp.
18. incident light microscopy.mp.
19. surface microscopy.mp.
20. dermoscopic.mp.
21. novel technique\*.mp.

22. (siascope or siascopy or siascopic).mp. [mp=title, abstract, original title, name of substance word, subject heading word, keyword heading word, protocol supplementary concept word, rare disease supplementary concept word, unique identifier, synonyms]
23. molemate.mp.
24. AI.mp.
25. artificial intelligence.mp. or exp Artificial Intelligence/
26. exp Image Processing, Computer-Assisted/ or computer assisted.mp.
27. exp Diagnosis, Computer-Assisted/ or computer aided.mp.
28. exp "Neural Networks (Computer)"/ or neural network\*.mp.
29. image analysis.mp.
30. automatic classification.mp.
31. machine learning.mp. or exp Machine Learning/
32. computer vision.mp.
33. digital analysis.mp.
34. digitally analysed.mp.
35. (analysis adj5 digitally).mp. [mp=title, abstract, original title, name of substance word, subject heading word, keyword heading word, protocol supplementary concept word, rare disease supplementary concept word, unique identifier, synonyms]
36. computer diagnos\*.mp.
37. exp Mobile Applications/ or mobile app\*.mp.
38. smartphone app\*.mp. or exp Smartphone/
39. recognition skill\*.mp.
40. automatic detection.mp.
41. collective intelligence assessment\*.mp.
42. analysis device\*.mp.
43. aid to diagnosis.mp.
44. diagnostic aid\*.mp.
45. (decision adj3 tool\*).mp. [mp=title, abstract, original title, name of substance word, subject heading word, keyword heading word, protocol supplementary concept word, rare disease supplementary concept word, unique identifier, synonyms]
46. tele-dermatos\*.mp. [mp=title, abstract, original title, name of substance word, subject heading word, keyword heading word, protocol supplementary concept word, rare disease supplementary concept word, unique identifier, synonyms]

47. tele-dermos\*.mp. [mp=title, abstract, original title, name of substance word, subject heading word, keyword heading word, protocol supplementary concept word, rare disease supplementary concept word, unique identifier, synonyms]
48. ((dermosc\* or dermatosc\* or epiluminescence microscopy or surface microscopy) adj3 (image\* or picture\* or photo\*)).mp. [mp=title, abstract, original title, name of substance word, subject heading word, keyword heading word, protocol supplementary concept word, rare disease supplementary concept word, unique identifier, synonyms]
49. 13 or 14 or 15 or 16 or 17 or 18 or 19 or 20 or 21 or 22 or 23 or 24 or 25 or 26 or 27 or 28 or 29 or 30 or 31 or 32 or 33 or 34 or 35 or 36 or 37 or 38 or 39 or 40 or 41 or 42 or 43 or 44 or 45 or 46 or 47 or 48
50. exp Melanoma/ or melanoma\*.mp.
51. exp Skin Neoplasms/ or skin neoplasm\*.mp.
52. pigmented nevus.mp. or exp Nevus, Pigmented/
53. (naevocarcinoma or nevocarcinoma).mp. [mp=title, abstract, original title, name of substance word, subject heading word, keyword heading word, protocol supplementary concept word, rare disease supplementary concept word, unique identifier, synonyms]
54. ((neoplasm\* or cancer\* or tumour\*) adj3 (skin or pigment\*)).mp. [mp=title, abstract, original title, name of substance word, subject heading word, keyword heading word, protocol supplementary concept word, rare disease supplementary concept word, unique identifier, synonyms]
55. ((suspicious or melanocytic or pigmented) adj3 (lesion\* or mole\* or naevus or nevus or naevi or nevi or skin)).mp. [mp=title, abstract, original title, name of substance word, subject heading word, keyword heading word, protocol supplementary concept word, rare disease supplementary concept word, unique identifier, synonyms]
56. skin lesion\*.mp.
57. 50 or 51 or 52 or 53 or 54 or 55 or 56
58. 12 and 49 and 57

**B. CENTRAL**

1. "primary health care":ti,ab,kw (Word variations have been searched)
2. "general practice":ti,ab,kw (Word variations have been searched)
3. "family practice":ti,ab,kw (Word variations have been searched)
4. family physician\*:ti,ab,kw (Word variations have been searched)
5. MeSH descriptor: [Primary Health Care] explode all trees
6. MeSH descriptor: [General Practice] explode all trees
7. MeSH descriptor: [Family Practice] explode all trees
8. MeSH descriptor: [Physicians, Family] explode all trees
9. ((family or general or community) near/2 (doctor\* or medicine or medical practitioner\* or medical practice\* or practice\* or practitioner\* or healthcare\* or health care\*)):ti,ab,kw (Word variations have been searched)
10. ((primary or community) near/2 (care\* or health care\* of healthcare\* or medical care\* or patient care\*)):ti,ab,kw (Word variations have been searched)
11. (nurse\* near/2 practi\*):ti,ab,kw (Word variations have been searched)
12. clinician with minimal dermoscopy training:ti,ab,kw (Word variations have been searched)
13. melanoma screening clinic\*:ti,ab,kw (Word variations have been searched)
14. non-expert\*:ti,ab,kw (Word variations have been searched)
15. generalist clinician\*:ti,ab,kw (Word variations have been searched)
16. #1 or #2 or #3 or #4 or #5 or #6 or #7 or #8 or #9 or #10 or #11 or #12 or #13 or #14 or #15
17. "dermoscopy":ti,ab,kw (Word variations have been searched)
18. dermatoscopy:ti,ab,kw (Word variations have been searched)
19. epiluminescence microscopy:ti,ab,kw (Word variations have been searched)
20. confocal microscopy:ti,ab,kw (Word variations have been searched)
21. photomicrograph:ti,ab,kw (Word variations have been searched)
22. incident light microscopy:ti,ab,kw (Word variations have been searched)
23. "surface microscopy":ti,ab,kw (Word variations have been searched)
24. "dermoscopic":ti,ab,kw (Word variations have been searched)
25. novel technique\*:ti,ab,kw (Word variations have been searched)
26. siascop\*:ti,ab,kw (Word variations have been searched)
27. molemate:ti,ab,kw (Word variations have been searched)
28. AI:ti,ab,kw (Word variations have been searched)

29. "artificial intelligence":ti,ab,kw (Word variations have been searched)
30. "computer assisted":ti,ab,kw (Word variations have been searched)
31. "computer aided":ti,ab,kw (Word variations have been searched)
32. "neural network":ti,ab,kw (Word variations have been searched)
33. image analysis:ti,ab,kw (Word variations have been searched)
34. automatic classification:ti,ab,kw (Word variations have been searched)
35. "machine learning":ti,ab,kw (Word variations have been searched)
36. computer vision:ti,ab,kw (Word variations have been searched)
37. digital analysis:ti,ab,kw (Word variations have been searched)
38. digitally analysed:ti,ab,kw (Word variations have been searched)
39. digitally analysed:ti,ab,kw (Word variations have been searched)
40. analysis near/5 digitally:ti,ab,kw (Word variations have been searched)
41. computer diagnos\*:ti,ab,kw (Word variations have been searched)
42. mobile app\*:ti,ab,kw (Word variations have been searched)
43. smartphone app\*:ti,ab,kw (Word variations have been searched)
44. recognition skill\*:ti,ab,kw (Word variations have been searched)
45. automatic detection:ti,ab,kw (Word variations have been searched)
46. collective intelligence assessment\*:ti,ab,kw (Word variations have been searched)
47. analysis device\*:ti,ab,kw (Word variations have been searched)
48. aid to diagnosis:ti,ab,kw (Word variations have been searched)
49. diagnostic aid\*:ti,ab,kw (Word variations have been searched)
50. decision near/3 tool\*:ti,ab,kw (Word variations have been searched)
51. tele-dermatos\*:ti,ab,kw (Word variations have been searched)
52. tele-dermos\*:ti,ab,kw (Word variations have been searched)
53. ((dermoscopy or dermatoscopy or epiluminescence microscopy or surface microscopy or dermoscopic) near/3 (image\* or picture\* or photo\*)):ti,ab,kw (Word variations have been searched)
54. MeSH descriptor: [Dermoscopy] explode all trees
55. MeSH descriptor: [Microscopy, Confocal] explode all trees
56. MeSH descriptor: [Photomicrography] explode all trees
57. MeSH descriptor: [Artificial Intelligence] explode all trees
58. MeSH descriptor: [Diagnosis, Computer-Assisted] explode all trees



59. MeSH descriptor: [Image Processing, Computer-Assisted] explode all trees
60. MeSH descriptor: [Neural Networks (Computer)] explode all trees
61. MeSH descriptor: [Machine Learning] explode all trees
62. MeSH descriptor: [Mobile Applications] explode all trees
63. MeSH descriptor: [Smartphone] explode all trees
64. #17 or #18 or #19 or #20 or #21 or #22 or #23 or #24 or #25 or #26 or #27 or #28 or #29 or #30 or #31 or #32 or #33 or #34 or #35 or #36 or #37 or #38 or #39 or #40 or #41 or #42 or #43 or #44 or #45 or #46 or #47 or #48 or #49 or #50 or #51 or #52 or #53 or #54 or #55 or #56 or #57 or #58 or #59 or #60 or #61 or #62 or #63
65. "skin neoplasm\*":ti,ab,kw (Word variations have been searched)
66. melanoma\*:ti,ab,kw (Word variations have been searched)
67. "pigmented nevus":ti,ab,kw (Word variations have been searched)
68. skin lesion\*:ti,ab,kw (Word variations have been searched)
69. naevocarcinoma or nevocarcinoma:ti,ab,kw (Word variations have been searched)
70. ((neoplasm\* or cancer\* or tumour\*) near/3 (skin or pigment\*)):ti,ab,kw (Word variations have been searched)
71. ((suspicious or melanocytic or pigmented) near/3 (lesion\* or mole\* or naevus or nevus or naevi or nevi or skin)):ti,ab,kw (Word variations have been searched)
72. MeSH descriptor: [Melanoma] explode all trees
73. MeSH descriptor: [Skin Neoplasms] explode all trees
74. MeSH descriptor: [Nevus, Pigmented] explode all trees
75. #65 or #66 or #67 or #68 or #69 or #70 or #71 or #72 or #73 or #74
76. #16 and #64 and #75

**C. EMBASE**

1. exp \*primary health care/
2. primary health care.ti,ab.
3. exp \*general practice/
4. general practice.ti,ab.
5. family practice.ti,ab.
6. ((family or general or community) adj2 (doctor\* or medicine or medical practitioner\* or medical practice\* or practice\* or practitioner\* or healthcare\* or health care\*)).ti,ab.
7. ((primary or community) adj2 (care\* or health care\* or healthcare\* or medical care\* or patient care\*)).ti,ab.
8. family physician\*.ti,ab.
9. (nurse\* adj2 practi\*).ti,ab.
10. clinician with minimal dermoscopy training.ti,ab.
11. melanoma screening clinic\*.ti,ab.
12. non-expert\*.ti,ab.
13. generalist clinician\*.ti,ab.
14. 1 or 2 or 3 or 4 or 5 or 6 or 7 or 8 or 9 or 10 or 11 or 12 or 13
15. exp \*epiluminescence microscopy/
16. epiluminescence microscopy.ti,ab.
17. dermoscopy.ti,ab.
18. dermatoscopy.ti,ab.
19. exp \*confocal microscopy/
20. confocal microscopy.ti,ab.
21. photomicrograph\*.ti,ab.
22. incident light microscopy.ti,ab.
23. surface microscopy.ti,ab.
24. dermoscopic.ti,ab.
25. novel technique\*.ti,ab.
26. (siascope or siascopy or siascopic).ti,ab.
27. molemate.ti,ab.
28. AI.ti,ab.
29. exp \*artificial intelligence/
30. artificial intelligence.ti,ab.
31. exp computer assisted diagnosis/
32. computer assisted.ti,ab.
33. exp computer analysis/
34. computer aided.ti,ab.
35. computer analysis.ti,ab.
36. exp \*artificial neural network/
37. neural network\*.ti,ab.
38. exp \*image analysis/
39. image analysis.ti,ab.
40. automatic classification.ti,ab.
41. exp \*machine learning/
42. machine learning.ti,ab.
43. computer vision.ti,ab.
44. digital analysis.ti,ab.
45. digitally analy\*.ti,ab.
46. (analysis adj5 digitally).ti,ab.
47. computer diagnos\*.ti,ab.

48. exp \*mobile application/
49. mobile app\*.ti,ab.
50. exp \*smartphone/
51. smartphone app\*.ti,ab.
52. recognition skill\*.ti,ab.
53. automatic detection.ti,ab.
54. collective intelligence assessment\*.ti,ab.
55. analysis device\*.ti,ab.
56. aid to diagnosis.ti,ab.
57. diagnostic aid\*.ti,ab.
58. (decision adj3 tool\*).ti,ab.
59. tele-dermatos\*.ti,ab.
60. tele-dermos\*.ti,ab.
61. ((dermoscopy or dermatoscopy or epiluminescence microscopy or surface microscopy or dermoscopic) adj3 (image\* or picture\* or photo\*)).ti,ab.
62. 15 or 16 or 17 or 18 or 19 or 20 or 21 or 22 or 23 or 24 or 25 or 26 or 27 or 28 or 29 or 30 or 31 or 32 or 33 or 34 or 35 or 36 or 37 or 38 or 39 or 40 or 41 or 42 or 43 or 44 or 45 or 46 or 47 or 48 or 49 or 50 or 51 or 52 or 53 or 54 or 55 or 56 or 57 or 58 or 59 or 60 or 61
63. exp \*melanoma/ or exp \*melanoma skin cancer/
64. melanoma\*.ti,ab.
65. exp \*skin tumor/ or exp \*skin cancer/
66. skin neoplasm\*.ti,ab.
67. exp \*pigmented nevus/
68. pigmented naevus.ti,ab.
69. skin lesion\*.ti,ab.
70. (naevocarcinoma or nevocarcinoma).ti,ab.
71. ((neoplasm\* or cancer\* or tumour\*) adj3 (skin or pigment\*)).ti,ab.
72. ((suspicious or melanocytic or pigmented) adj3 (lesion\* or mole\* or naevus or nevus or naevi or nevi or skin)).ti,ab.
73. 63 or 64 or 65 or 66 or 67 or 68 or 69 or 70 or 71 or 72
74. 14 and 62 and 73

**D. CINAHL**

- 66 S15 AND S56 AND S65  
65 S57 OR S58 OR S59 OR S60 OR S61 OR S62 OR S63 OR S64  
64 (MH "Skin Neoplasms+")  
63 (MH "Melanoma+")  
62 ((suspicious or melanocytic or pigment\*) N3 (lesion\* or mole\* or naevus or nevus or naevi or nevi or skin))  
61 ((tumour\* or neoplasm\* or cancer\*) N3 (skin or pigment\*))  
60 naevocarcinoma or nevocarcinoma  
59 skin lesion\*  
58 skin neoplasm\*  
57 melanoma\*  
56 S16 OR S17 OR S18 OR S19 OR S20 OR S21 OR S22 OR S23 OR S24 OR S25 OR S26 OR S27 OR S28 OR S29 OR S30 OR S31 OR S32 OR S33 OR S34 OR S35 OR S36 OR S37 OR S38 OR S39 OR S40 OR S41 OR S42 OR S43 OR S44 OR S45 OR S46 OR S47 OR S48 OR S49 OR S50 OR S51 OR S52 OR S53 OR S54 OR S55  
55 (MH "Smartphone+")  
54 (MH "Mobile Applications")  
53 (MH "Neural Networks (Computer)")  
52 (MH "Image Processing, Computer Assisted+") OR (MH "Image Interpretation, Computer Assisted+") OR (MH "Diagnosis, Computer Assisted+")  
51 (MH "Artificial Intelligence+")  
50 ((dermoscop\* or dermatoscopy or epiluminescence microscopy or surface microscopy) N3 (image\* or picture\* or photo\*))  
49 tele-dermatos\*  
48 tele-dermos\*  
47 decision N3 tool\*  
46 diagnos\* N4 aid\*  
45 analysis device\*  
44 collective intelligence assessment\*  
43 automatic detection  
42 recognition skill\*  
41 smartphone app\*  
40 mobile app\*  
39 computer diagnos\*  
38 analysis N5 digital\*  
37 digitally analysed  
36 digital analysis  
35 computer vision  
34 machine learning  
33 automatic classification  
32 image analysis  
31 neural network\*  
30 computer aided  
29 computer assisted  
28 artificial intelligence  
27 AI  
26 molemate  
25 siascop\*  
24 novel technique\*  
23 dermoscopic

- 22 surface microscopy
- 21 incident light microscopy
- 20 photomicrograph
- 19 confocal microscopy
- 18 epiluminescence microscopy
- 17 dermatoscopy
- 16 dermoscopy
- 15 S1 OR S2 OR S3 OR S4 OR S5 OR S6 OR S7 OR S8 OR S9 OR S10 OR S11 OR S12 OR S13 OR S14
- 14 (MH "Physicians, Family")
- 13 (MH "Family Practice")
- 12 (MH "Primary Health Care")
- 11 generalist clinician\*
- 10 non-expert\*
- 9 melanoma screening clinic\*
- 8 clinician with minimal dermoscopy training
- 7 nurse\* N2 practi\*
- 6 family physician\*
- 5 ((primary or community) N2 (care\* or health care\* or healthcare\* or medical care\* or patient care\*))
- 4 ((family or general or community) N2 (doctor\* or medicine or medical practitioner\* or medical practice\* or practice\* or practitioner\* or healthcare\* or health care\*))
- 3 family practice
- 2 general practice
- 1 primary health care

**E. SCOPUS**

((TITLE-ABS-KEY(primary w/1 (health w/1 care))) OR (TITLE-ABS-KEY(general w/1 practice)) OR (TITLE-ABS-KEY(family w/1 practice)) OR (TITLE-ABS-KEY(family w/1 physician\*)) OR (TITLE-ABS-KEY((family W/2 doctor\*) OR (family W/2 medicine) OR (family W/2 (medical w/1 practitioner\*)) OR (family W/2 (medical w/1 practice\*)) OR (family W/2 practice\*) OR (family W/2 practitioner\*) OR (family W/2 healthcare\*) OR (family W/2 (health w/1 care\*)))) OR (TITLE-ABS-KEY((general W/2 doctor\*) OR (general W/2 medicine) OR (general W/2 (medical w/1 practitioner\*)) OR (general W/2 (medical w/1 practice\*)) OR (general W/2 practice\*) OR (general W/2 practitioner\*) OR (general W/2 healthcare\*) OR (general W/2 (health w/1 care\*)))) OR (TITLE-ABS-KEY((community W/2 doctor\*) OR (community W/2 medicine) OR (community W/2 (medical w/1 practitioner\*)) OR (community W/2 (medical w/1 practice\*)) OR (community W/2 practice\*) OR (community W/2 practitioner\*) OR (community W/2 healthcare\*) OR (community W/2 (health w/1 care\*)))) OR ((TITLE-ABS-KEY((community W/2 care\*) OR (community W/2 (medical w/1 care\*)) OR (community W/2 (patient w/1 care\*)) OR (community W/2 healthcare\*) OR (community W/2 (health w/1 care\*)))) OR (TITLE-ABS-KEY((primary W/2 care\*) OR (primary W/2 (medical w/1 care\*)) OR (primary W/2 (patient w/1 care\*)) OR (primary W/2 healthcare\*) OR (primary W/2 (health w/1 care\*)))) OR (TITLE-ABS-KEY(nurs\* W/2 practi\*)) OR (TITLE-ABS-KEY(clinician w/1 with w/1 minimal w/1 dermoscopy w/1 training)) OR (TITLE-ABS-KEY(melanoma w/1 screening w/1 clinic\*)) OR (TITLE-ABS-KEY(generalist w/1 clinician\*)))

**AND**

((TITLE-ABS-KEY(surface w/1 microscopy)) OR (TITLE-ABS-KEY(dermoscopic)) OR (TITLE-ABS-KEY(novel w/1 technique)) OR (TITLE-ABS-KEY( siascop\*)) OR (TITLE-ABS-KEY(molemate)) OR (TITLE-ABS-KEY(ai)) OR (TITLE-ABS-KEY(artificial w/1 intelligence))) OR ((TITLE-ABS-KEY(computer w/1 assisted)) OR (TITLE-ABS-KEY(computer w/1 aided)) OR (TITLE-ABS-KEY(neural w/1 network)) OR (TITLE-ABS-KEY(image w/1 analysis)) OR (TITLE-ABS-KEY(automatic w/1 classification)) OR (TITLE-ABS-KEY(machine w/1 learning)) OR (TITLE-ABS-KEY(computer w/1 vision))) OR ((TITLE-ABS-KEY(digital\* W/5 analys\*)) OR (TITLE-ABS-KEY(computer w/1 diagnos\*)) OR (TITLE-ABS-KEY(mobile w/1 app\*)) OR (TITLE-ABS-KEY(smartphone)) OR (TITLE-ABS-KEY(recognition w/1 skill\*)) OR (TITLE-ABS-KEY(automatic w/1 detection)) OR (TITLE-ABS-KEY(collective w/1 intelligence AND assessment\*)) OR ((TITLE-ABS-KEY(analysis w/1 device\*)) OR (TITLE-ABS-KEY(diagnos\* W/3 aid\*)) OR (TITLE-ABS-KEY(decision W/3 aid\*)) OR (TITLE-ABS-KEY(decision W/3 tool\*)) OR (TITLE-ABS-KEY(tele-dermos\*)) OR (TITLE-ABS-KEY(tele-dermatos\*)) OR (TITLE-ABS-KEY((dermos\* W/3 image\*) OR (dermos\* W/3 photo\*) OR (dermos\* W/3 picture\*))) OR ((TITLE-ABS-KEY((dermatos\* W/3 image\*) OR (dermatos\* W/3 photo\*) OR (dermatos\* W/3 picture\*))) OR (TITLE-ABS-KEY((epiluminescence W/4 image\*) OR (epiluminescence W/4 photo\*) OR (epiluminescence W/4 picture\*))) OR (TITLE-ABS-KEY(((surface w/1 microscopy) W/4 image\*) OR ((surface w/1 microscopy) W/4 photo\*) OR ((surface w/1 microscopy) W/4 picture\*))) OR ((TITLE-ABS-KEY(dermoscopy )) OR (TITLE-ABS-KEY(dermatoscopy)) OR (TITLE-ABS-KEY(epiluminescence w/1 microscopy)) OR (TITLE-ABS-KEY(confocal w/1 microscopy)) OR (TITLE-ABS-KEY(photomicrograph)) OR (TITLE-ABS-KEY(incident w/1 light w/1 microscopy)))

**AND**

((TITLE-ABS-KEY(melanoma)) OR (TITLE-ABS-KEY(naevocarcinoma OR nevocarcinoma)) OR (TITLE-ABS-KEY((pigment\* W/3 neoplasm\*) OR (pigment\* W/3 cancer\*) OR (pigment\* W/3 tumor\*) OR (pigment\* W/3 lesion\*))) OR (TITLE-ABS-KEY((pigment\* W/3 lesion\*) OR (pigment\* W/3 mole\*) OR (pigment\* W/3 naev\*) OR (pigment\* W/3 nev\*) OR (pigment\* W/3 skin))) OR (TITLE-ABS-KEY((melanocytic W/3 lesion\*) OR (melanocytic W/3 mole\*) OR (melanocytic W/3 naev\*) OR (melanocytic W/3 nev\*) OR (melanocytic W/3 skin))) OR (TITLE-ABS-KEY((suspicious W/3 lesion\*) OR (suspicious W/3 mole\*) OR (suspicious W/3 naev\*) OR (suspicious W/3 nev\*) OR (suspicious W/3 skin))) OR (TITLE-ABS-KEY((skin W/3 neoplasm\*) OR (skin W/3 cancer\*) OR (skin W/3 tumor\*) OR (skin W/3 lesion\*)))

### Appendix 3 – Full list of studies that underwent full text review, their assessors and outcomes

| Paper                           | Assessor |         |         |         |         | Reason for exclusion |                  |                                         |                 |                |
|---------------------------------|----------|---------|---------|---------|---------|----------------------|------------------|-----------------------------------------|-----------------|----------------|
|                                 | OJ       | LJ      | SH      | FW      | MvM     | No dermoscopy use    | Not in 1ary care | Not peer reviewed / conference abstract | No primary data | Clinical Audit |
| Affifi <i>et al.</i> 2017 (A)   | Exclude  |         | Exclude |         |         |                      |                  |                                         |                 |                |
| Affifi <i>et al.</i> 2017 (B)   | Exclude  |         | Exclude |         |         |                      |                  |                                         |                 |                |
| Ahmadi <i>et al.</i> 2017       | Include  | Include |         |         |         |                      |                  |                                         |                 |                |
| Alonso <i>et al.</i> 2016       | Exclude  |         | Exclude |         |         |                      |                  |                                         |                 |                |
| Argenziano <i>et al.</i> 2006   | Include  |         | Include |         |         |                      |                  |                                         |                 |                |
| Baldi <i>et al.</i> 2010        | Exclude  | Exclude |         |         |         |                      |                  |                                         |                 |                |
| Bataille <i>et al.</i> 2011     | Exclude  | Exclude |         |         |         |                      |                  |                                         |                 |                |
| Bergman <i>et al.</i> 2008      | Exclude  |         |         |         | Exclude |                      |                  |                                         |                 |                |
| Bergstrom <i>et al.</i> 2012    | Exclude  |         |         |         |         |                      |                  |                                         |                 |                |
| Berryman <i>et al.</i> 2012     | Exclude  |         | Exclude |         |         |                      |                  |                                         |                 |                |
| Blackledge <i>et al.</i> 2009   | Exclude  | Exclude |         |         |         |                      |                  |                                         |                 |                |
| Borve <i>et al.</i> 2015        | Include  | Include |         |         |         |                      |                  |                                         |                 |                |
| Bourne <i>et al.</i> 2012       | Include  |         |         | Include |         |                      |                  |                                         |                 |                |
| Bowns <i>et al.</i> 2006        | Exclude  |         |         | Exclude |         |                      |                  |                                         |                 |                |
| Brinkhuijsen <i>et al.</i> 2008 | Exclude  |         |         |         | Exclude |                      |                  |                                         |                 |                |
| Brown <i>et al.</i> 2000        | Exclude  |         | Exclude |         |         |                      |                  |                                         |                 |                |
| Carli <i>et al.</i> 2007        | Exclude  |         | Exclude |         |         |                      |                  |                                         |                 |                |
| Carrara <i>et al.</i> 2007      | Exclude  | Exclude |         |         |         |                      |                  |                                         |                 |                |
| Chao Li <i>et al.</i> 2013      | Exclude  |         |         | Exclude |         |                      |                  |                                         |                 |                |
| Chappuis <i>et al.</i> 2016     | Include  |         | Include |         |         |                      |                  |                                         |                 |                |
| Chen <i>et al.</i> 2011         | Exclude  | Exclude |         | Exclude |         |                      |                  |                                         |                 |                |
| Congalton <i>et al.</i> 2015    | Exclude  |         |         | Exclude |         |                      |                  |                                         |                 |                |

|                                        |         |         |         |         |  |  |  |  |  |  |
|----------------------------------------|---------|---------|---------|---------|--|--|--|--|--|--|
| Cook <i>et al.</i> 2015                | Exclude | Exclude |         |         |  |  |  |  |  |  |
| Coras <i>et al.</i> 2003               | Exclude | Exclude |         |         |  |  |  |  |  |  |
| Dahlen Gyllencreutz <i>et al.</i> 2017 | Exclude |         |         | Exclude |  |  |  |  |  |  |
| Del Mar <i>et al.</i> 1995             | Exclude |         | Exclude |         |  |  |  |  |  |  |
| Dolianitis <i>et al.</i> 2005          | Exclude |         |         | Exclude |  |  |  |  |  |  |
| Drugge <i>et al.</i> 2010              | Exclude | Exclude |         |         |  |  |  |  |  |  |
| Ferrandiz <i>et al.</i> 2017           | Include |         |         | Include |  |  |  |  |  |  |
| Greenberg <i>et al.</i> 2012           | Exclude | Exclude |         |         |  |  |  |  |  |  |
| Griffiths <i>et al.</i> 2010           | Exclude |         |         | Exclude |  |  |  |  |  |  |
| Grimaldi <i>et al.</i> 2009            | Include |         |         | Include |  |  |  |  |  |  |
| Hennessy <i>et al.</i> 2010            | Exclude |         | Exclude |         |  |  |  |  |  |  |
| Jain <i>et al.</i> 2012                | Exclude | Exclude | Exclude |         |  |  |  |  |  |  |
| Joliffe <i>et al.</i> 2001 (A)         | Exclude |         |         | Exclude |  |  |  |  |  |  |
| Joliffe <i>et al.</i> 2001 (B)         | Exclude |         |         | Exclude |  |  |  |  |  |  |
| Kenney <i>et al.</i> 2016              | Exclude |         |         | Exclude |  |  |  |  |  |  |
| Kitchener <i>et al.</i> 2009           | Exclude | Exclude | Exclude |         |  |  |  |  |  |  |
| Koelink <i>et al.</i> 2014             | Include | Include |         |         |  |  |  |  |  |  |
| Kroemer <i>et al.</i> 2001             | Exclude |         |         | Exclude |  |  |  |  |  |  |
| Laheru <i>et al.</i> 2017              | Exclude |         |         | Exclude |  |  |  |  |  |  |
| Livingstone <i>et al.</i> 2015         | Include |         |         | Include |  |  |  |  |  |  |
| Lorentzen <i>et al.</i> 1999           | Exclude | Exclude |         | Exclude |  |  |  |  |  |  |
| MacKinnon <i>et al.</i> 2016           | Exclude |         | Exclude |         |  |  |  |  |  |  |
| Mahendran <i>et al.</i> 2005           | Exclude | Exclude |         |         |  |  |  |  |  |  |
| Masood <i>et al.</i> 2014 (A)          | Exclude | Exclude |         |         |  |  |  |  |  |  |
| Masood <i>et al.</i> 2014 (B)          | Exclude |         | Exclude |         |  |  |  |  |  |  |
| Masood <i>et al.</i> 2015              | Exclude |         | Exclude |         |  |  |  |  |  |  |
| Massone <i>et al.</i> 2014             | Exclude |         |         | Exclude |  |  |  |  |  |  |
| Menzies <i>et al.</i> 2005             | Include | Include |         |         |  |  |  |  |  |  |
| Menzies <i>et al.</i> 2009             | Include |         | Include |         |  |  |  |  |  |  |



|                                   |         |         |         |         |  |  |  |  |  |
|-----------------------------------|---------|---------|---------|---------|--|--|--|--|--|
| Mikolajczyk <i>et al.</i> 2017    | Exclude | Exclude |         |         |  |  |  |  |  |
| Monheit <i>et al.</i> 2011        | Exclude |         | Exclude |         |  |  |  |  |  |
| Moreno-Ramirez <i>et al.</i> 2006 | Include |         |         | Include |  |  |  |  |  |
| Moreno-Ramirez <i>et al.</i> 2007 | Exclude | Exclude |         |         |  |  |  |  |  |
| Morris <i>et al.</i> 2017 (A)     | Include |         | Include |         |  |  |  |  |  |
| Morris <i>et al.</i> 2017 (B)     | Include | Include |         |         |  |  |  |  |  |
| Morton <i>et al.</i> 2011         | Exclude |         |         | Exclude |  |  |  |  |  |
| Naka <i>et al.</i> 2017           | Exclude | Exclude |         | Exclude |  |  |  |  |  |
| Nelson <i>et al.</i> 2016         | Exclude |         |         | Exclude |  |  |  |  |  |
| Pagnanelli <i>et al.</i> 2003     | Include |         | Include |         |  |  |  |  |  |
| Perakis <i>et al.</i> 2014        | Exclude | Exclude |         |         |  |  |  |  |  |
| Phelan <i>et al.</i> 2008         | Exclude |         |         | Exclude |  |  |  |  |  |
| Picollo <i>et al.</i> 2000        | Exclude |         |         | Exclude |  |  |  |  |  |
| Picollo <i>et al.</i> 2002        | Exclude |         |         | Exclude |  |  |  |  |  |
| Rademaker <i>et al.</i> 2010      | Exclude |         |         | Exclude |  |  |  |  |  |
| Riding <i>et al.</i> 2016         | Exclude |         | Exclude |         |  |  |  |  |  |
| Robson <i>et al.</i> 2012*        | Exclude | Exclude |         |         |  |  |  |  |  |
| Rogers <i>et al.</i> 2016         | Include |         |         | Include |  |  |  |  |  |
| Rogers <i>et al.</i> 2017         | Include |         |         | Include |  |  |  |  |  |
| Rosendahl <i>et al.</i> 2011      | Include | Include |         |         |  |  |  |  |  |
| Rosendahl <i>et al.</i> 2012 (A)  | Exclude | Exclude | Exclude |         |  |  |  |  |  |
| Rosendahl <i>et al.</i> 2012 (B)  | Include |         |         | Include |  |  |  |  |  |
| Secker <i>et al.</i> 2014         | Include | Include |         |         |  |  |  |  |  |
| Shapiro <i>et al.</i> 2004        | Exclude |         | Exclude |         |  |  |  |  |  |
| Sheraz <i>et al.</i> 2011         | Exclude | Exclude |         |         |  |  |  |  |  |
| Singh <i>et al.</i> 2016          | Exclude | Exclude | Exclude |         |  |  |  |  |  |
| Skrovseth <i>et al.</i> 2010      | Exclude | Exclude |         |         |  |  |  |  |  |
| Smith <i>et al.</i> 2000          | Exclude | Exclude |         |         |  |  |  |  |  |
| Soyer <i>et al.</i> 2004          | Exclude |         | Exclude | Exclude |  |  |  |  |  |

|                                    |         |         |         |         |  |  |  |  |  |
|------------------------------------|---------|---------|---------|---------|--|--|--|--|--|
| Stratton <i>et al.</i> 2016        | Include | Include |         | Include |  |  |  |  |  |
| Swanson <i>et al.</i> 2017         | Exclude | Exclude |         |         |  |  |  |  |  |
| Tan <i>et al.</i> 2010             | Exclude |         |         | Exclude |  |  |  |  |  |
| Tan <i>et al.</i> 2015             | Exclude |         | Exclude |         |  |  |  |  |  |
| Thomas <i>et al.</i> 2017          | Exclude | Exclude |         |         |  |  |  |  |  |
| Van der Heijden <i>et al.</i> 2013 | Include |         |         | Include |  |  |  |  |  |
| Wadhawan <i>et al.</i> 2011        | Exclude |         |         | Exclude |  |  |  |  |  |
| Watts <i>et al.</i> 2017           | Exclude |         | Exclude |         |  |  |  |  |  |
| Westerhoff <i>et al.</i> 2000      | Include | Include |         |         |  |  |  |  |  |
| Winkelmann <i>et al.</i> 2015 (A)  | Exclude |         | Exclude |         |  |  |  |  |  |
| Winkelmann <i>et al.</i> 2015 (B)  | Exclude |         | Exclude |         |  |  |  |  |  |
| Wray <i>et al.</i> 2015            | Exclude |         |         | Exclude |  |  |  |  |  |
| Zaludek <i>et al.</i> 2008         | Exclude |         |         | Exclude |  |  |  |  |  |
| Zortea <i>et al.</i> 2014          | Exclude |         | Exclude |         |  |  |  |  |  |
| Zouridakis <i>et al.</i> 2015      | Exclude | Exclude | Exclude |         |  |  |  |  |  |
